# Supplementary material
Source: publisher site journal article supplement (https://www.dovepress.com/article/451720)
Supplement: Supplementary file 1 [file get_supplementary_file.php]

**Shen’ge formula protects cardiac function in rats with pressure overload-induced heart failure**

Boyong Qiu 1,2 †, Siyu Qiao 2,†, Xiujuan Shi 2, Lin Shen 2, Bing Deng 2, Zilin Ma 2, Duan Zhou 2,*, Yihong Wei 2,*

*1Heart Center/National Regional (Traditional Chinese Medicine) Cardiovascular Diagnosis and Treatment Center, The First Affiliated Hospital of Henan University of Chinese Medicine, Zhengzhou, Henan, 450000, China*

*2Cardiovascular Department, Longhua Hospital affiliated to Shanghai University of Traditional Chinese Medicine, No.725, South Wanping Road, Xuhui District, Shanghai, 200032, China*

*† These authors contributed equally to this work.*

***Correspondence:**

Yihong Wei, E-mail: weiyihong2022@shutcm.edu.cn; Duan Zhou, E-mail: [zhouduan@126.com;](mailto:zhouduan@126.com;)


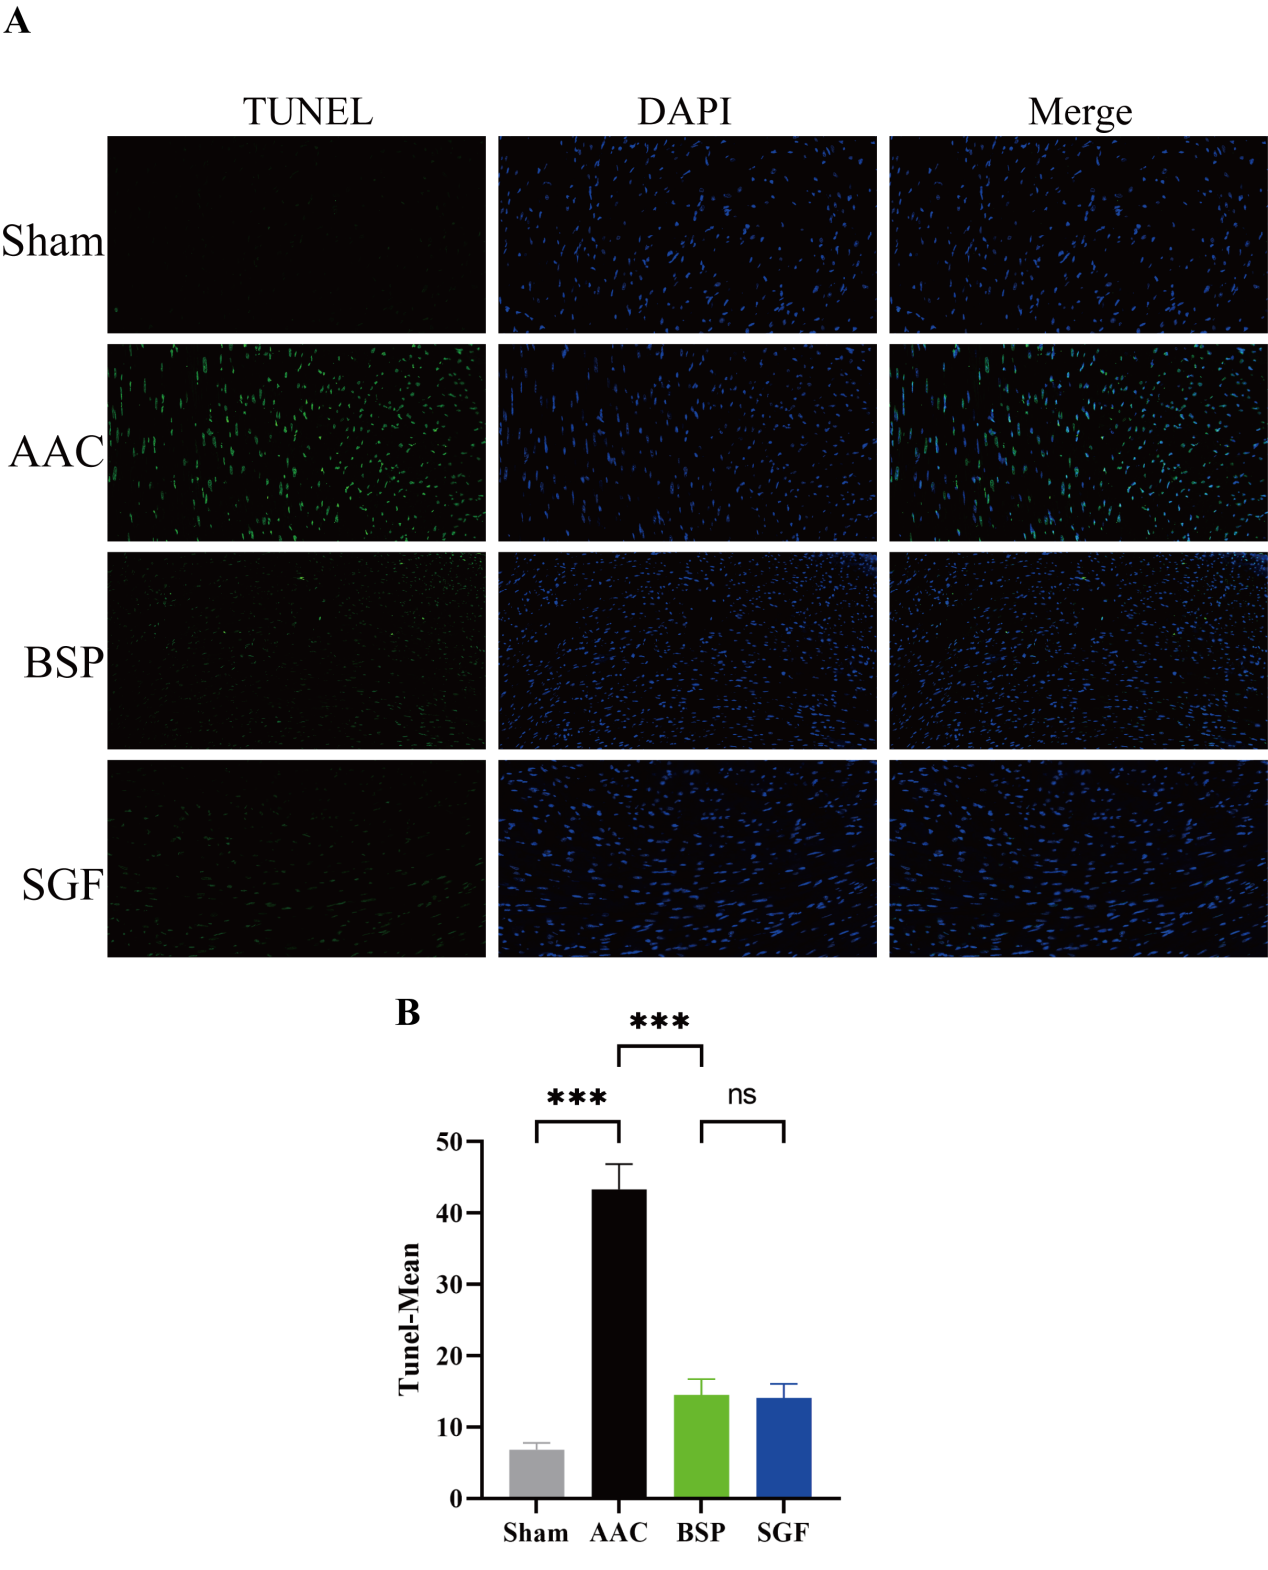


Supplementary Figure 1. SGF decreased AAC-induced apoptosis. (A) The representative images of TUNEL in heart tissue sections from different groups. (B) The semi-quantitative fluorescence analysis results by ImageJ. The scale is 100μm. ns p > 0.05; *** p < 0.001. Data are presented as mean ± standard deviation (n = 5). SGF, Shen’ge formula; AAC, abdominal aortic constriction; BSP, bisoprolol.
